# Supplementary material for: Tumor-associated tissue eosinophilia predicts favorable clinical outcome in solid tumors: a meta-analysis
Source: PubMed Central journal article supplement (PMC7240929; doi:10.1186/s12885-020-06966-3), 2020-05-20
Supplement: 12885_2020_6966_MOESM1_ESM.pdf [file 12885_2020_6966_MOESM1_ESM.pdf]

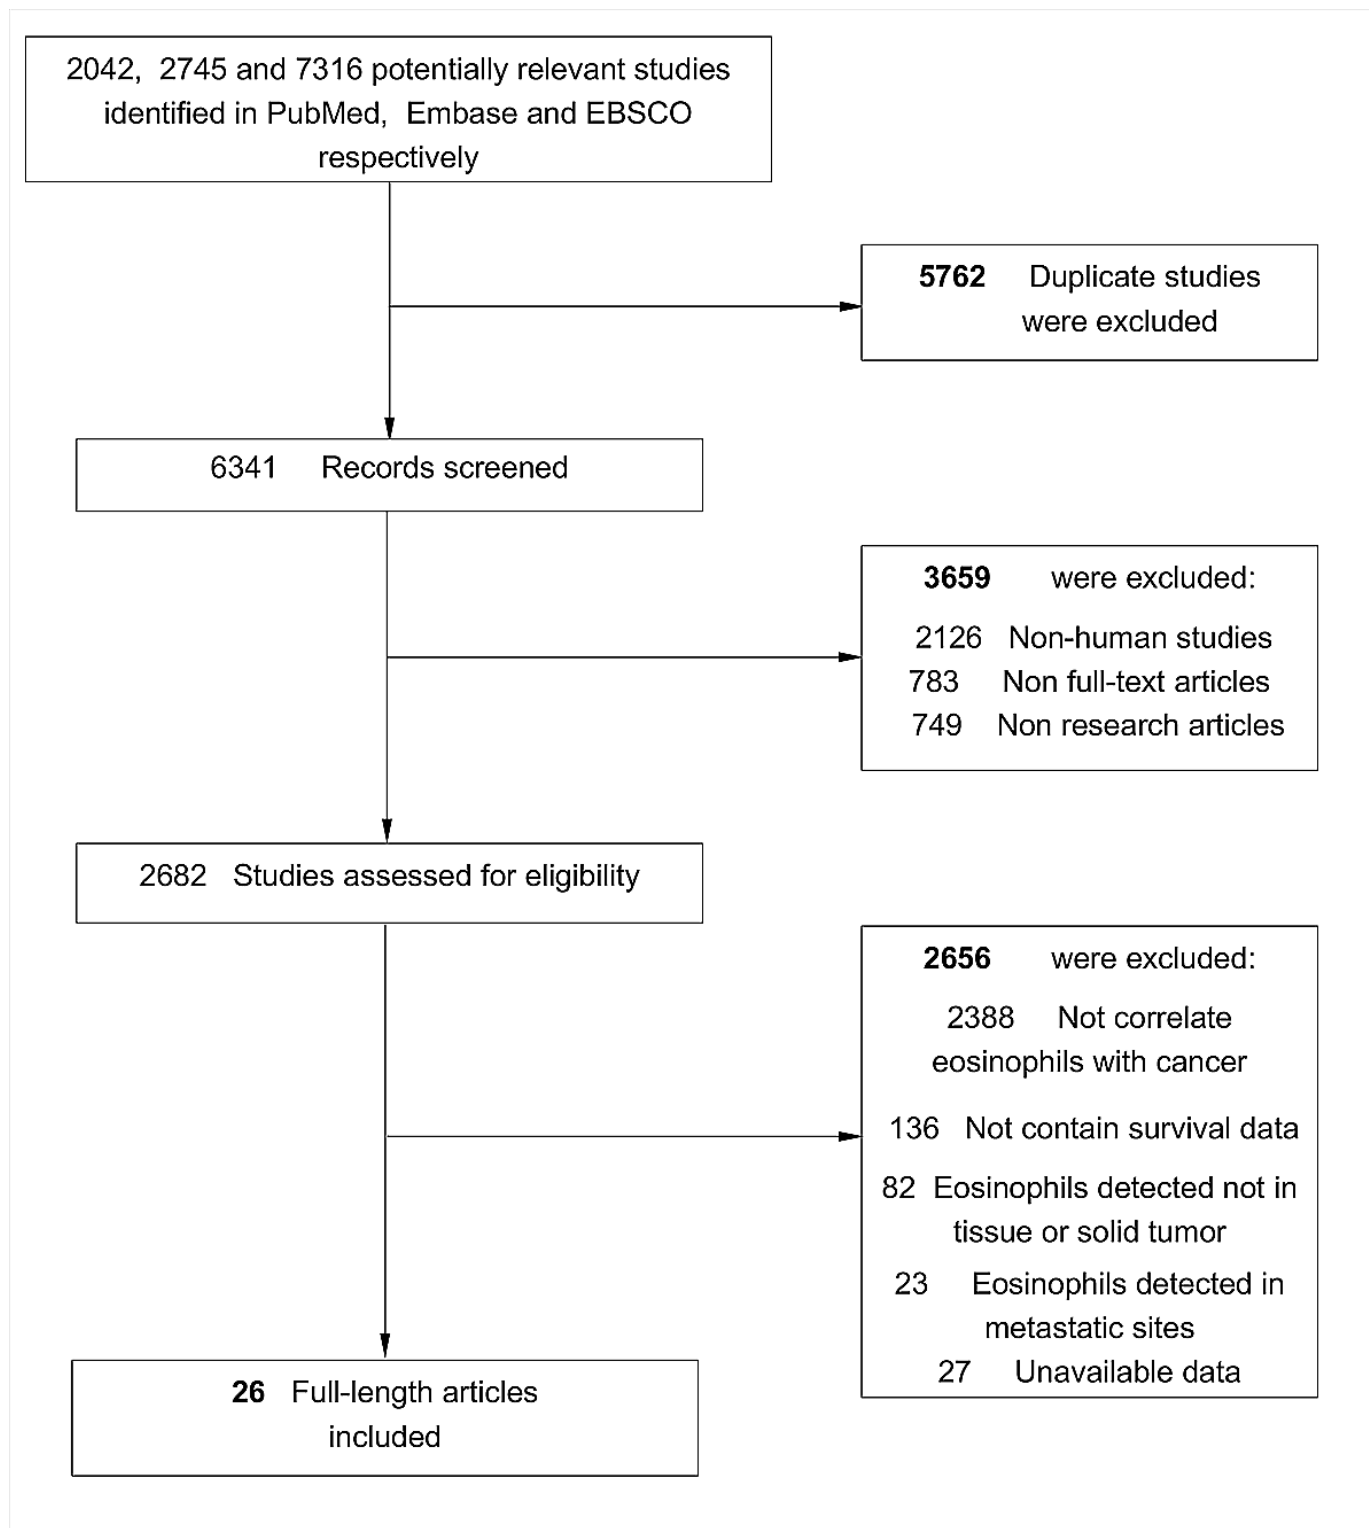

**Fig. S1.** Flow chart diagram of study selection.

A. OS

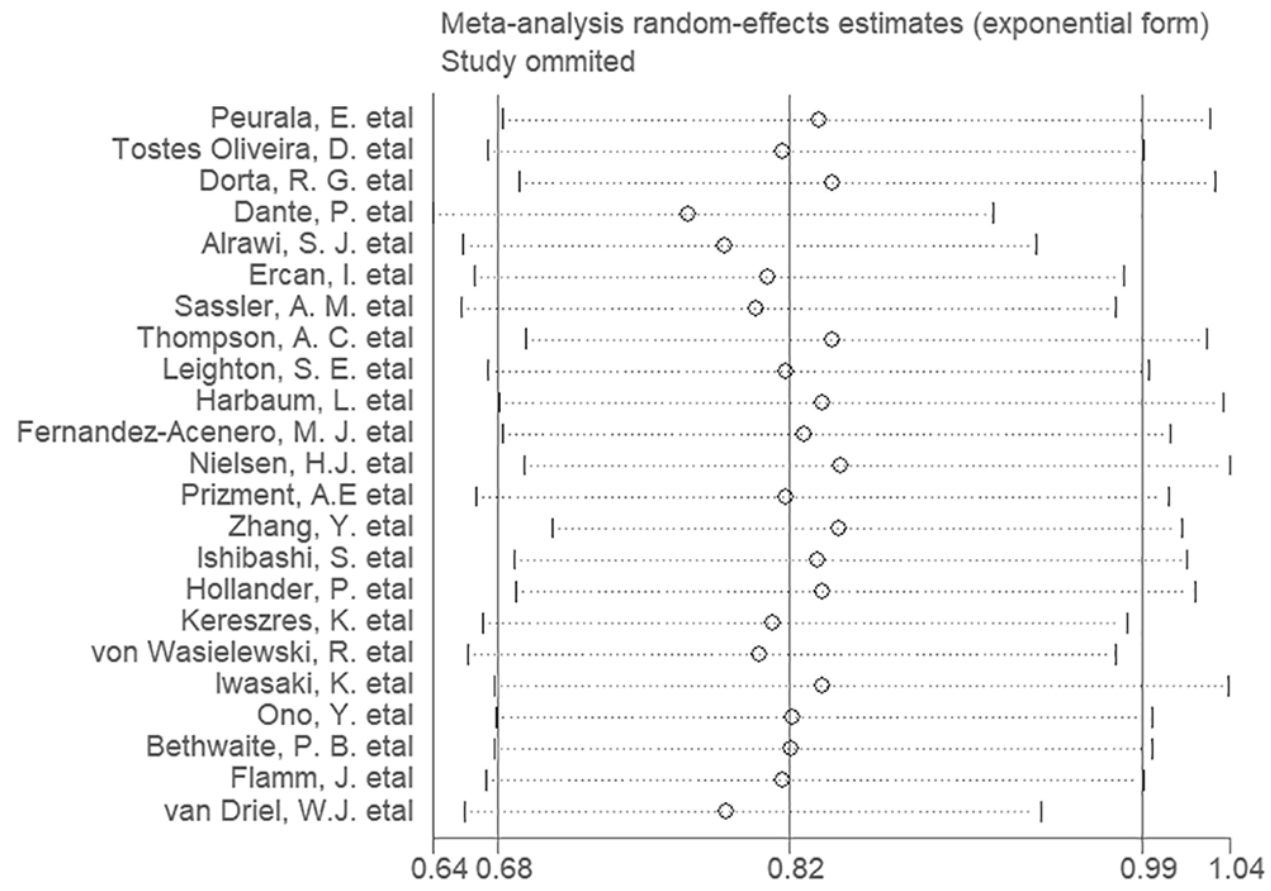

B. DFS

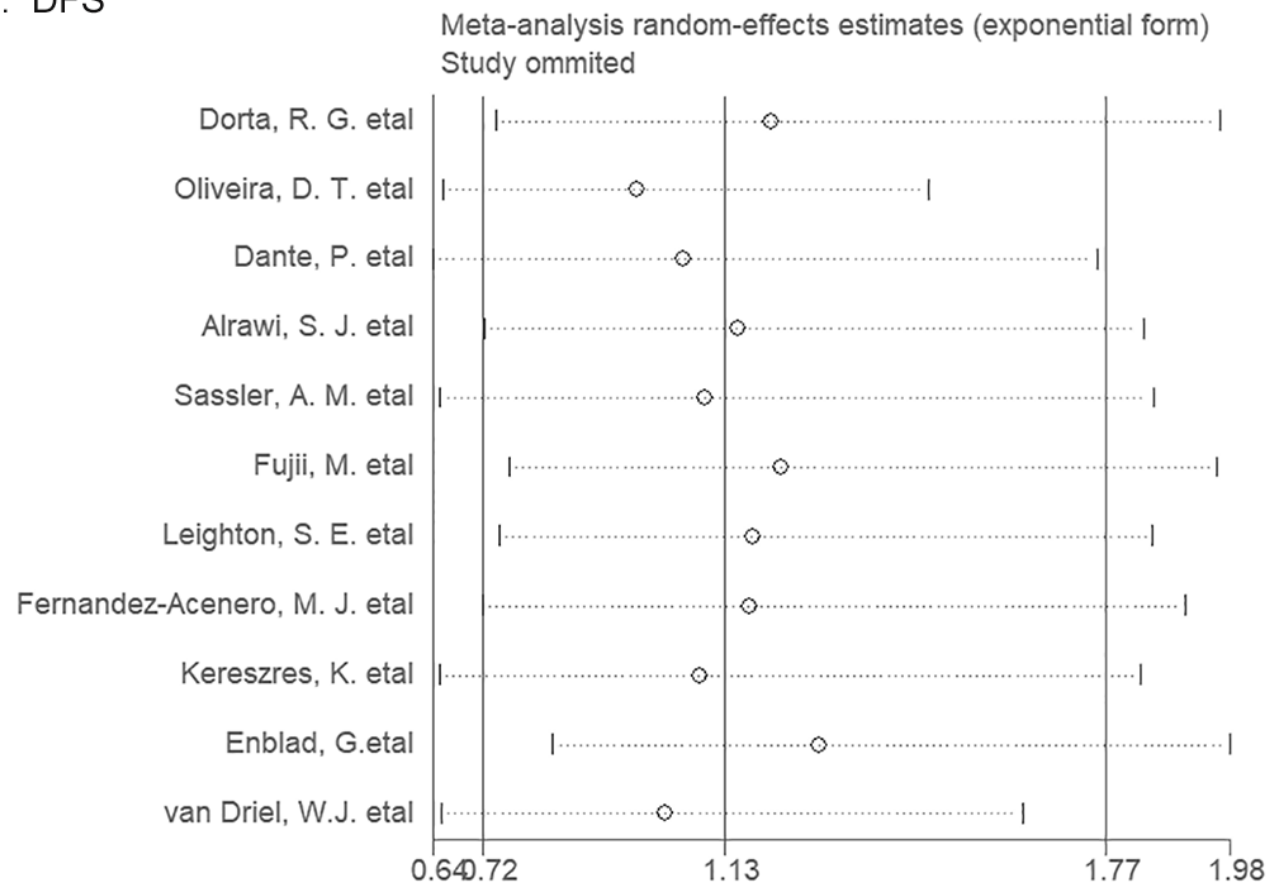

Fig. S2. Plots describing the influence of individual studies on the overall HRs for OS (A) and DFS (B) in human cancers.

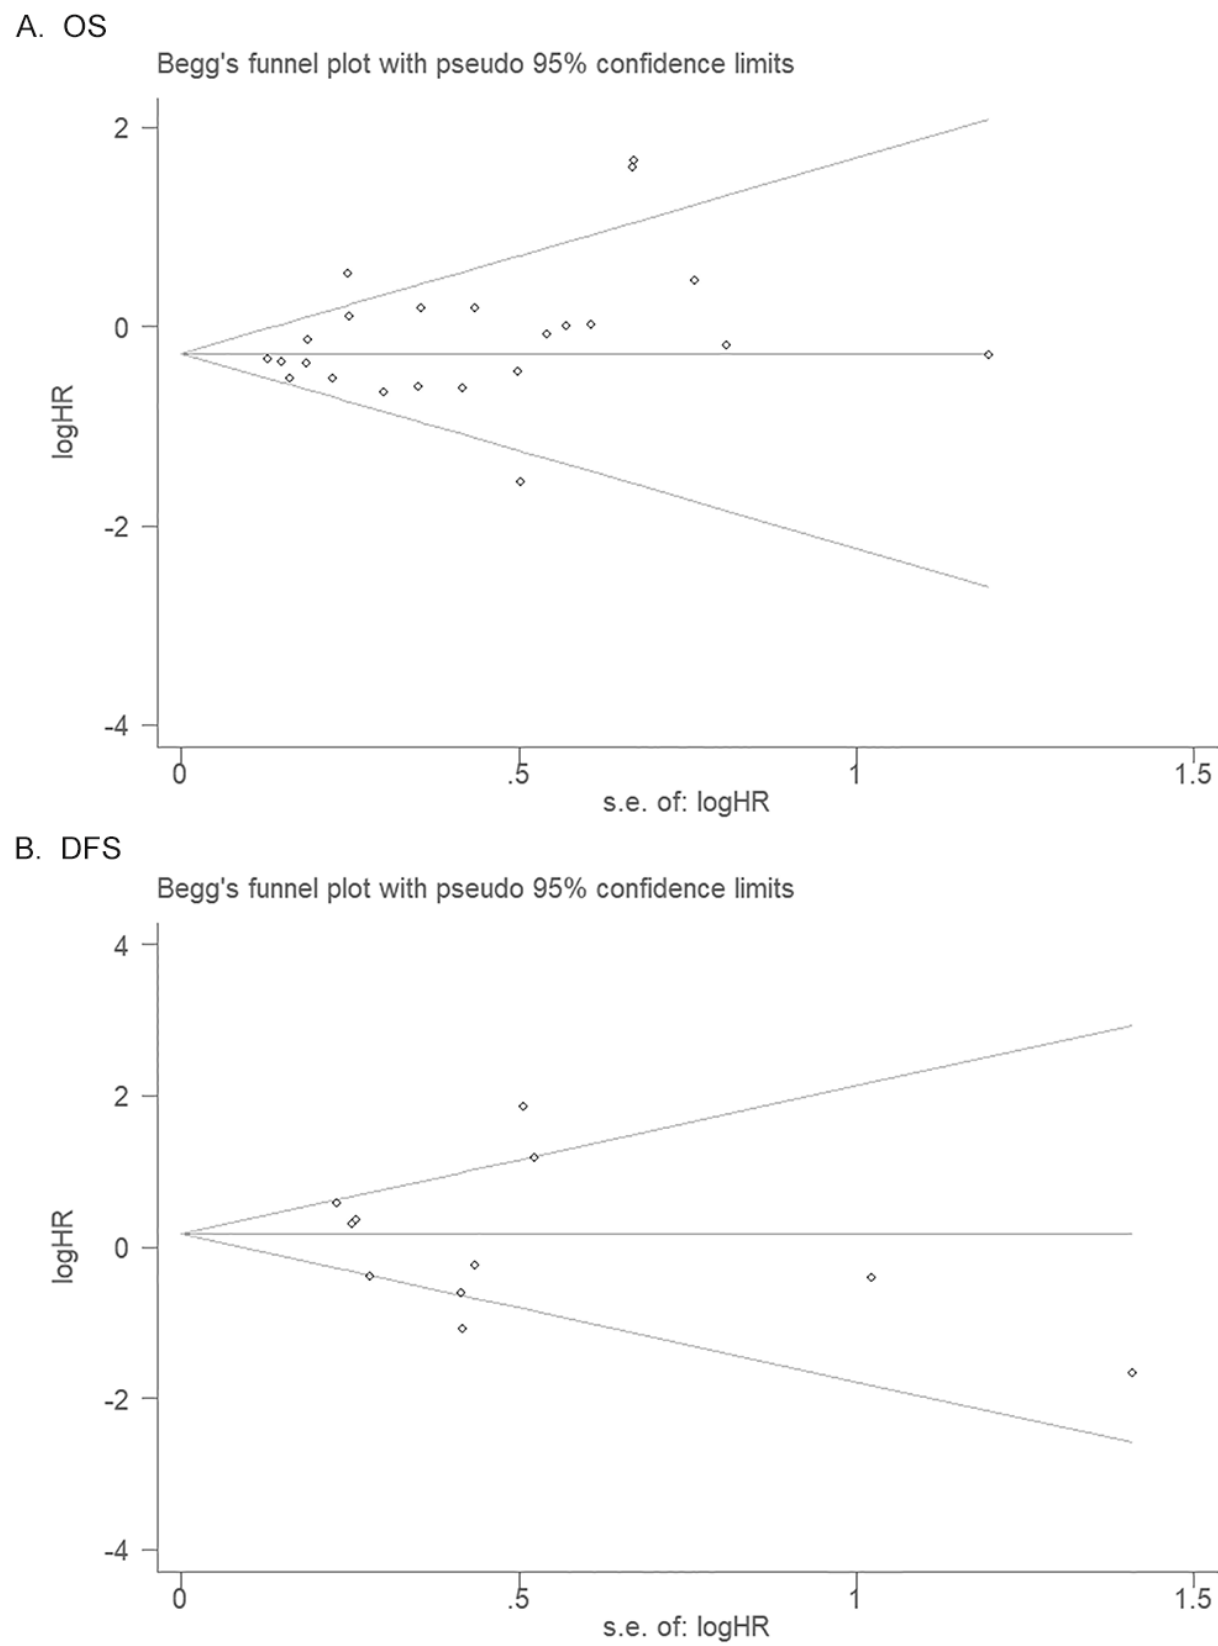

**Fig. S3.** Funnel plots displayed the potential publication bias between TATE and OS (A) or DFS (B) in patients.

**Table S1.** Characteristics of the included studies for OR analysis of clinicopathological features.

| Study                              | Year | Tumor type               | No. of Patients | TATE: Present / absent | Lymph node metastasis (Yes / No) | Tumor stage | I + II / III+IV           | Lymphatic invasion (Yes / No) | Vascular invasion (Yes / No) |
|------------------------------------|------|--------------------------|-----------------|------------------------|----------------------------------|-------------|---------------------------|-------------------------------|------------------------------|
| Tostes Oliveira, D. etal [19]      | 2009 | Oral cancer              | 43              | 21/22                  | P:(6/15);<br>A:(5/17)            | I - IV      | P:(6/15);<br>A:(9/13)     | NR                            | NR                           |
| Leighton, S. E. etal [24]          | 1996 | Nasopharyngeal carcinoma | 96              | 65/31                  | P:(49/16);<br>A:(24/7)           | NR          | NR                        | NR                            | NR                           |
| Harbaum, L. etal [25]              | 2015 | Colorectal cancer        | 381             | 101/280                | P:(33/68);<br>A:(135/145)        | IV          | P:(66/35);<br>A:(135/145) | P:(25/76);<br>A:(101/179)     | P:(19/82);<br>A:(68/212)     |
| Fernandez-Acenero, M. J. etal [26] | 2000 | Colorectal cancer        | 126             | 29/97                  | P:(27/2);<br>A:(94/3)            | Duke's A-C  | NR                        | NR                            | P:(70/9); A:(113/21)         |
| Zhang, Y. etal [29]                | 2014 | Esophageal carcinoma     | 36              | 18/18                  | P:(9/9);<br>A:(13/5)             | I - IV      | P:(11/7);<br>A:(13/5)     | NR                            | NR                           |
| Oliveira, D. T. etal [16]          | 2012 | Oral cancer              | 71              | 35/36                  | NR                               | I - II      | NR                        | P:(9/26); A:(14/22)           | P:(30/5); A:(31/5)           |

T: primary tumor; N: lymph node; M: metastasis; NR: not reported. P: present; A: absent.
